# Supplementary material for: A Nomogram for Diagnosing Bile Acid Diarrhea Based on Postprandial Fecal Bile Acids and Serum FGF19
Source: Research Square preprint supplement (doi:10.21203/rs.3.rs-8291284/v1), 2026-01-12
Supplement: Supplementary file 1 [file 383d60d7988f932f5ad0308e.docx]

###

| Variables | 单因素 | | | | | | 多因素 | | | | | |
| --- | --- | --- | --- | --- | --- | --- | --- | --- | --- | --- | --- | --- |
| β | S.E | Z | *P* | OR (95%CI) |  | β | S.E | Z | *P* | OR (95%CI) |
| 性别 |  |  |  |  |  |  |  |  |  |  |  |
| 1 |  |  |  |  | 1.00 (Reference) |  |  |  |  |  |  |
| 2 | -0.07 | 0.47 | -0.15 | 0.883 | 0.93 (0.37 ~ 2.35) |  |  |  |  |  |  |
| Stool consistency(BSFS) | 1.74 | 0.43 | 4.00 | **<.001** | 5.68 (2.43 ~ 13.28) |  | 1.55 | 0.72 | 2.15 | **0.032** | 4.73 (1.15 ~ 19.56) |
| Age(years) | -0.03 | 0.02 | -1.63 | 0.103 | 0.97 (0.93 ~ 1.01) |  |  |  |  |  |  |
| Stool Frequency(Bm/Day) | -0.11 | 0.57 | -0.15 | 0.985 | 0.97 (0.39 ~ 3.35) |  | -0.27 | 0.37 | -0.15 | 0.785 | 0.97 (0.11~ 2.98) |
| 7aC4(ng/mL) | 6.09 | 1380.92 | 0.00 | 0.996 | 443.20 (0.00 ~ Inf) |  |  |  |  |  |  |
| FGF19(pg/mL) | -0.11 | 0.03 | -3.98 | **<.001** | 0.89 (0.84 ~ 0.94) |  | -0.09 | 0.04 | -2.12 | **0.034** | 0.91 (0.83 ~ 0.99) |
| BMI(kg/m2) | 0.15 | 0.09 | 1.62 | 0.106 | 1.16 (0.97 ~ 1.39) |  |  |  |  |  |  |
| FBA（umol/L） | 0.57 | 0.14 | 4.11 | **<.001** | 1.77 (1.35 ~ 2.32) |  | 0.25 | 0.25 | 0.96 | 0.336 | 1.28 (0.78 ~ 2.11) |
| FBA after HFM(umol/L) | 0.61 | 0.14 | 4.48 | **<.001** | 1.84 (1.41 ~ 2.39) |  | 0.35 | 0.16 | 2.12 | **0.034** | 1.42 (1.03 ~ 1.96) |
