# Supplementary figures and images for: A Nomogram for Diagnosing Bile Acid Diarrhea Based on Postprandial Fecal Bile Acids and Serum FGF19
Source: Research Square preprint supplement (doi:10.21203/rs.3.rs-8291284/v1), 2026-01-12

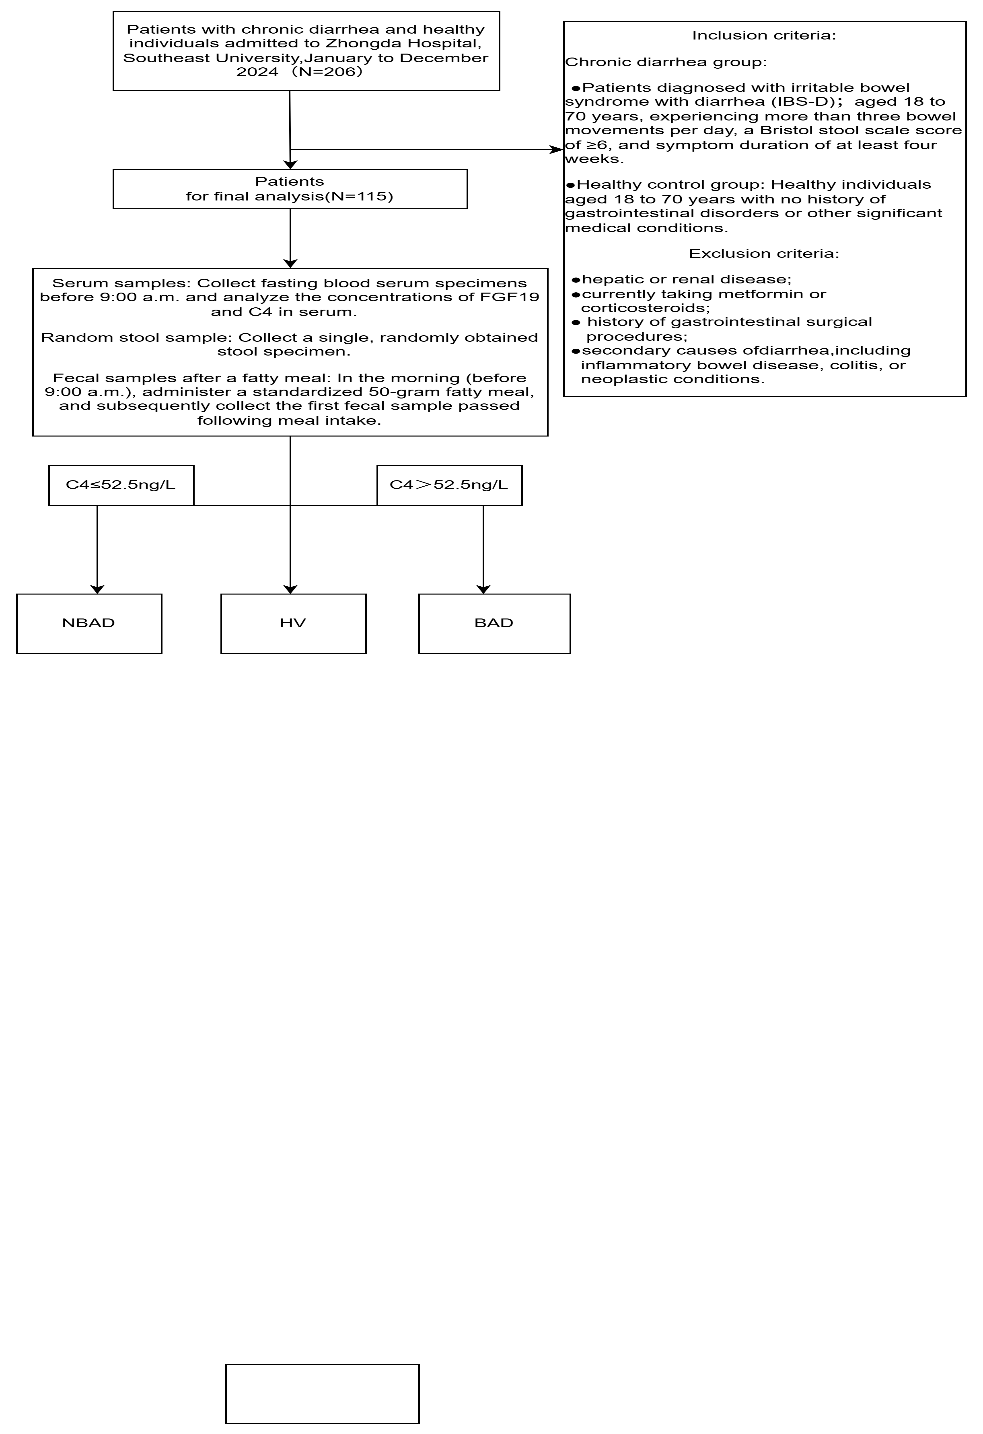

Supplement: Supplementary file 2 [file ab899b5c3e69f25b1ed818f4.docx]
